# Supplementary material for: Behavior of platinum(iv) complexes in models of tumor hypoxia: cytotoxicity, compound distribution and accumulation
Source: Royal Society of Chemistry journal article supplement (doi:10.1039/c5mt00312a), 2016-02-10
Supplement: c5mt00312a1.pdf [file c5mt00312a1.pdf]

## Supplementary Information

### **Behavior of platinum(IV) complexes in models of tumor hypoxia: cytotoxicity, compound distribution and accumulation**

Ekaterina Schreiber-Brynzak,<sup>a</sup> Verena Pichler,<sup>a</sup> Petra Heffeter,<sup>b,c</sup> Buck Hanson,<sup>d,g</sup> Sarah  
Theiner,<sup>a,c</sup> Irene Lichtscheidl-Schultz,<sup>e</sup> Christoph Kornauth,<sup>f</sup> Luca Bamonti,<sup>a</sup> Vineet Dhery,<sup>b,c</sup>  
Diana Groza,<sup>b,c</sup> David Berry,<sup>d,g</sup> Walter Berger,<sup>b,c</sup> Mathea S. Galanski,<sup>a</sup> Michael Jakupec,<sup>a,c,g\*</sup>  
Bernhard K. Keppler<sup>a,c,g</sup>

<sup>a</sup> University of Vienna, Institute of Inorganic Chemistry, Waehringer Strasse 42, 1090 Vienna, Austria

<sup>b</sup> Medical University of Vienna, Department of Medicine I, Institute of Cancer Research and  
Comprehensive Cancer Center, Borschkegasse 8a, 1090 Vienna, Austria

<sup>c</sup> University of Vienna, Research Platform “Translational Cancer Therapy Research”, Waehringer  
Strasse 42, 1090 Vienna, Austria

<sup>d</sup> University of Vienna, Department of Microbiology and Ecosystem Science, Division of Microbial  
Ecology, Althanstrasse 14 (UZA I), 1090 Vienna, Austria

<sup>e</sup> University of Vienna, Core Facility Cell Imaging and Ultrastructure Research, Althanstrasse 14  
(UZA I), 1090 Vienna, Austria

<sup>f</sup> Medical University of Vienna, Clinical Institute of Pathology, Vienna General Hospital, Spitalgasse  
23, 1090 Vienna, Austria

<sup>g</sup> University of Vienna, Research Network Chemistry Meets Microbiology, Althanstrasse 14 (UZA I),  
1090 Vienna, Austria

\*Corresponding author. Tel. +43 1 4277 52610. E-mail address: [michael.jakupec@univie.ac.at](mailto:michael.jakupec@univie.ac.at) (M. A.  
Jakupec).

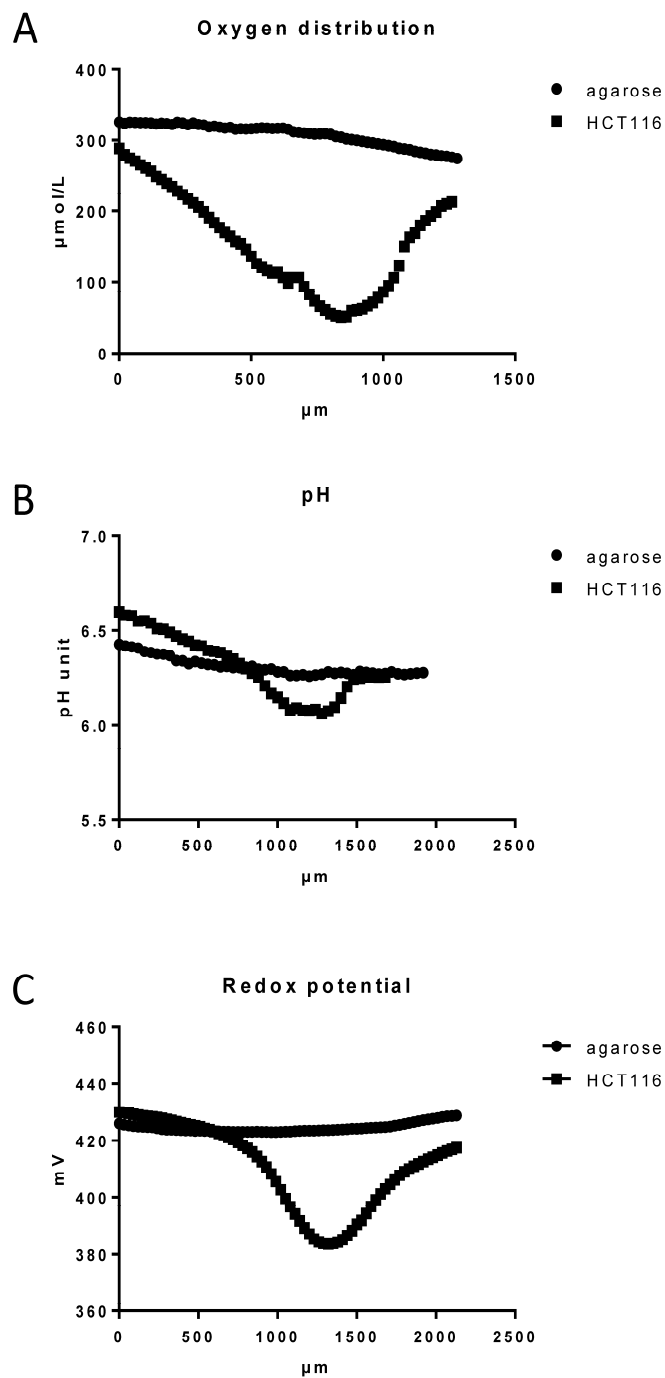

**Fig. S1** **A.** Oxygen measurement in hypoxic HCT116 spheroids and agarose as negative control. Measurements were conducted every 20  $\mu\text{m}$ . **B.** pH measurement in hypoxic HCT116 spheroids and agarose as negative control. Measurements were conducted every 40  $\mu\text{m}$ . **C.** Redox potential

measurement in hypoxic HCT116 spheroids and agarose as negative control. Measurements were conducted every 40  $\mu\text{m}$ .
